# Supplementary material
Source: PubMed Central journal article supplement (PMC5651758)
Supplement: pnas.1707840114.sapp.pdf [file pnas.1707840114.sapp.pdf]

Supporting Information Appendix for

***Mycobacterium tuberculosis* inhibits human innate immune responses  
via the production of TLR2 antagonist glycolipids**

*Landry Blanc, Martine Gilleron, Jacques Prandi, Ok-ryul Song, Mi-Seon Jang, Brigitte  
Gicquel, Daniel Drocourt, Olivier Neyrolles, Priscille Brodin, Gérard Tiraby, Alain  
Vercellone and Jérôme Nigou*

**This PDF file contains the SI Materials and Methods, Table S1, Figures S1 to S4  
and references.**

## SI MATERIAL AND METHODS

### Mutant library screening

50  $\mu$ l of 3-week old *M. tuberculosis* Beijing GC1237 mutant culture from the previously used library (1) were two-fold diluted in PBS and seeded into a 96-well plate (Nunc), and 20  $\mu$ l of the diluted suspension were subsequently transferred into a 384-well assay plate (Greiner, 781091) using the BioTek Precision TM XS sample processor. Mutants from three 96-well plates were transferred into columns 4 to 21 of one 384-well plate. The entire library was thus formatted into forty-four 384-well plates. Column 3 was harvested with cells only (negative control, not induced) and column 22 was harvested with LPS (used as a positive control inducing NF- $\kappa$ B activation) at 1  $\mu$ g/mL (A22-D22), LPS at 100 ng/mL (E22-H22), *M. tuberculosis* GC1237 wild-type strain (MOI 5, I22-L22; MOI 1 M22-P22). Subsequently, 30  $\mu$ l of the THP-1-Blue<sup>TM</sup> cells (Invivogen) suspension at  $6.7 \times 10^5$  cells/ml ( $2 \times 10^4$  cells/well) in HEK-Blue<sup>TM</sup> Detection medium (Invivogen) were distributed into columns 3 to 22 of the 384-well assay plates using the AquaMax DW4 liquid handling device (Molecular Devices). After 16 h incubation at 37°C under 5% CO<sub>2</sub>, NF- $\kappa$ B activation was monitored by reading O.D. at 625 nm using a Victor3 (Perkin Elmer). Plate by plate quality check was performed by determination of Z' (negative control vs LPS at 1  $\mu$ g/mL). Bacterial titer of each mutant in 96-well plates was quantified by reading at O.D. at 595 nm. Mutants for which the titer was lower than 0.1 (corresponding to a too low MOI) were removed from the analysis. 64 Hits with a Z score value  $< -1.45$  or  $> 2$  were then selected for amplification and mapping of the transposon insertion sites by ligation-mediated PCR (2).

## **Bacterial growth**

*M. tuberculosis* GC1237 wild-type and selected transposon mutant strains were grown for 2 months on Sauton's medium as surface pellicle. Bacteria were dissociated by gentle shaking for 30 s with 4-mm glass beads and numbered with a Thoma cell counting chamber.

## **Purification of natural mycobacterial lipids - Preparation of synthetic analogs - TLR2 and NOD2 ligands**

Natural sulfoglycolipids, Ac<sub>2</sub>SGL and Ac<sub>4</sub>SGL, were purified and analyzed by MALDI-TOF mass spectrometry, and synthetic Pam<sub>2</sub>SGL (i.e. 2,3-dipalmitoyl-2'-sulfate- $\alpha$ - $\alpha'$ -D-trehalose; SGL1), unsulfated SGL and Trehalose sulfate prepared as previously described (3-6). Lipoproteins were purified from *M. tuberculosis* GC1237 strains by a phenol/water extraction and quantified as previously described (7, 8). Lipoproteins were labeled with FITC (Fluorescein isothiocyanate isomer I, Sigma) according to manufacturer's instructions. FITC-labeling did not alter their ability to stimulate HEK-TLR2 cells. LM was purified from *M. tuberculosis* H37Rv (9). Lipoglycans were purified from *M. tuberculosis* GC1237 strains and quantified by monosaccharide analysis relatively to proteins as previously described (7). Pam<sub>3</sub>CSK<sub>4</sub>, FSL-1 and MDP were from Invivogen.

## **THP-1 cell experiments**

THP-1-Dual<sup>TM</sup> cells (Invivogen), derivatives of THP-1 monocyte/macrophage human cells that stably express a NF- $\kappa$ B-inducible reporter system (secreted alkaline phosphatase), were used according to the manufacturer's instruction. The different stimuli and competitors were added, at MOI or concentrations indicated in the figures, in 96-wells plates and cells were then distributed at 10<sup>5</sup> cells per well in 200  $\mu$ l RPMI 1640 culture medium (Lonza). After 18 h, NF- $\kappa$ B activation was measured by mixing 20  $\mu$ l of the culture supernatant and 180  $\mu$ l of Quanti-

Blue<sup>TM</sup>, and reading O.D. at 630 nm, and IL-8 was assayed in the culture supernatant by sandwich ELISA using commercially available kits (eBioscience). To investigate TLR2 dependence, cells were pre-incubated for 30 min at 37°C, before stimuli addition, with 10 µg/ml of anti-TLR2 monoclonal antibody (clone T2.5, InvivoGen) or isotype control (IgG1, eBioscience). For monitoring CD40 expression, cells were harvested and resuspended in Dubelco's PBS, 0.5 % BSA and labelled with CD40-PE conjugated antibody (Beckman Coulter). Cells were subjected to flow cytometry analysis by using the CellQuest software on a flow cytometer (FACSCalibur; Becton Dickinson).

### **HEK-TLR2 cell experiments**

HEK cell lines were all derivatives of the HEK-Blue<sup>TM</sup> Null1 cell line (InvivoGen). HEK-Blue Null1 cells express a secreted alkaline phosphatase reporter gene under the control of the IFN-β minimal promoter fused to five NF-κB and AP-1 binding sites. First, HEK-Blue Null1 was transfected with a blasticidin resistant plasmid pUNO1-hTLR2 (HEK-TLR2) or a hygromycin resistant plasmid pVITRO2-hTLR2-hCD14 (HEK-TLR2-CD14). Then, co-receptors were introduced into HEK-TLR2 by transfection with hygromycin resistant plasmids pUNO3-hCD36 and pUNO3-hMARCO to generate HEK-TLR2-CD36 and HEK-TLR2-MARCO respectively. Finally, HEK-TLR2-CD14 was transfected with a blasticidin resistant plasmid pUNO1-hSRAI to obtain HEK-TLR2-CD14-SRA. All plasmids are mammalian expression vectors from InvivoGen. HEK cell lines were maintained in Dulbecco's modified Eagle's medium (DMEM, Gibco) containing 10% Fetal Bovine Serum (FBS, Gibco), 4.5 g/l glucose, 2 mM L-glutamine, 100 U/ml penicillin, 100 µg/ml streptomycin (Sigma) 100 µg/ml zeocin (InvivoGen). The cell culture medium was supplemented with 10 µg/ml blasticidin for HEK-TLR2 cells, with 200 µg/ml hygromycin for HEK-TLR2-CD14 cells, and with 200 µg/ml hygromycin and 10 µg/ml blasticidin for the other cell lines. The different stimuli and

competitors were added, at concentrations indicated in the figure legends, in 96-wells plates and cells were then distributed at  $5 \times 10^4$  cells per well in 200  $\mu$ l DMEM culture medium. Alkaline phosphatase activity was measured after 18 h, as described above.

### **Statistical analysis**

Results are expressed as a mean  $\pm$  SEM and were analyzed using One-way analysis of variance followed by Tukey test to determine significant differences between samples.

## REFERENCES

1. Brodin P, *et al.* (2010) High content phenotypic cell-based visual screen identifies *Mycobacterium tuberculosis* acyltrehalose-containing glycolipids involved in phagosome remodeling. *PLoS Pathog* 6(9):e1001100.
2. Prod'hom G, *et al.* (1998) A reliable amplification technique for the characterization of genomic DNA sequences flanking insertion sequences. *FEMS Microbiol Lett* 158(1):75-81.
3. Gilleron M, *et al.* (2004) Diacylated sulfoglycolipids are novel mycobacterial antigens stimulating CD1-restricted T cells during infection with *Mycobacterium tuberculosis*. *J Exp Med* 199(5):649-659.
4. Layre E, *et al.* (2011) Deciphering sulfoglycolipids of *Mycobacterium tuberculosis*. *J Lipid Res* 52(6):1098-1110.
5. Guiard J, *et al.* (2008) Synthesis of diacylated trehalose sulfates: candidates for a tuberculosis vaccine. *Angew Chem Int Ed Engl* 47(50):9734-9738.
6. Guiard J, *et al.* (2009) Fatty acyl structures of mycobacterium tuberculosis sulfoglycolipid govern T cell response. *J Immunol* 182(11):7030-7037.
7. Krishna S, *et al.* (2011) Lipoglycans contribute to innate immune detection of mycobacteria. *PloS One* 6(12):e28476.
8. Gehring AJ, Dobos KM, Belisle JT, Harding CV, & Boom WH (2004) *Mycobacterium tuberculosis* LprG (Rv1411c): a novel TLR-2 ligand that inhibits human macrophage class II MHC antigen processing. *J Immunol* 173(4):2660-2668.
9. Gilleron M, Nigou J, Nicolle D, Quesniaux V, & Puzo G (2006) The acylation state of mycobacterial lipomannans modulates innate immunity response through toll-like receptor 2. *Chem Biol* 13(1):39-47.

| Mutant ID | Gene                                | Putative function                                            | Variation of NF- $\kappa$ B activation (%) <sup>a</sup> |
|-----------|-------------------------------------|--------------------------------------------------------------|---------------------------------------------------------|
| P003H04   | <i>rv1068c-rv1069c</i> <sup>b</sup> | Unknown, PE-PGRS family protein - Unknown, conserved protein | -31 ± 16                                                |
| P037D01   | <i>rv1510</i>                       | Unknown, probable membrane protein                           | -28 ± 11                                                |
| P069F01   | <i>rv3109 (moaA1)</i>               | Molybdenum cofactor biosynthesis                             | -27 ± 16                                                |
| P088D08   | <i>rv0032 (bioF2)</i>               | Biotin biosynthesis                                          | -22 ± 23                                                |
| P102B07   | <i>Rv2067c</i>                      | Unknown, conserved protein                                   | +26 ± 10                                                |
| P110E03   | <i>rv3350c</i>                      | Unknown, PPE family protein                                  | -10 ± 3                                                 |
| P116E09   | <i>rv3112 (moaD1)</i>               | Molybdenum cofactor biosynthesis                             | +31 ± 3                                                 |
| P117C11   | <i>rv3112 (moaD1)</i>               | Molybdenum cofactor biosynthesis                             | +21 ± 2                                                 |
| P118B01   | <i>rv3823c (mmp18)</i>              | Sulfoglycolipid biosynthesis                                 | +18 ± 7                                                 |
| P119B10   | <i>rv0032 (bioF2)</i>               | Biotin biosynthesis                                          | -26 ± 12                                                |

**Table S1 : List of confirmed mutants that induce an altered NF- $\kappa$ B activation.**

<sup>a</sup> corresponds to the mean  $\pm$  S.D. of the variation of NF- $\kappa$ B activation as compared to the wild-type strain at MOI = 30; calculated as  $(OD_{630nm}(\text{mutant}) - OD_{630nm}(\text{wild-type})) / OD_{630nm}(\text{wild-type}) \times 100$ , from at least three independent experiments.

<sup>b</sup> the transposon was inserted in the intergenic region.

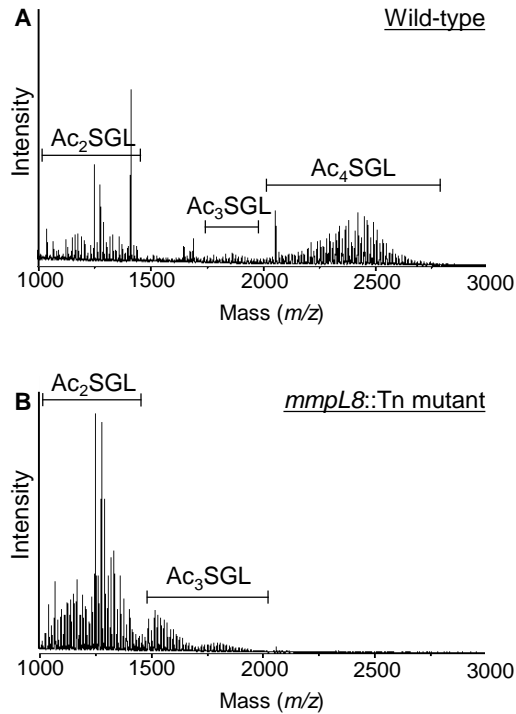

**Fig. S1 : *mmpL8::Tn mutant* is impaired for Ac<sub>4</sub>SGL production.**

The total bacterial lipids obtained by chloroform/methanol extraction were partitioned by acetone precipitation. Lipids contained in the acetone-soluble fraction were analyzed by MALDI-TOF mass spectrometry in the negative-ion mode. Negative mass spectra recorded for wild-type (A) and *mmpL8::Tn mutant* (B) strains are shown.



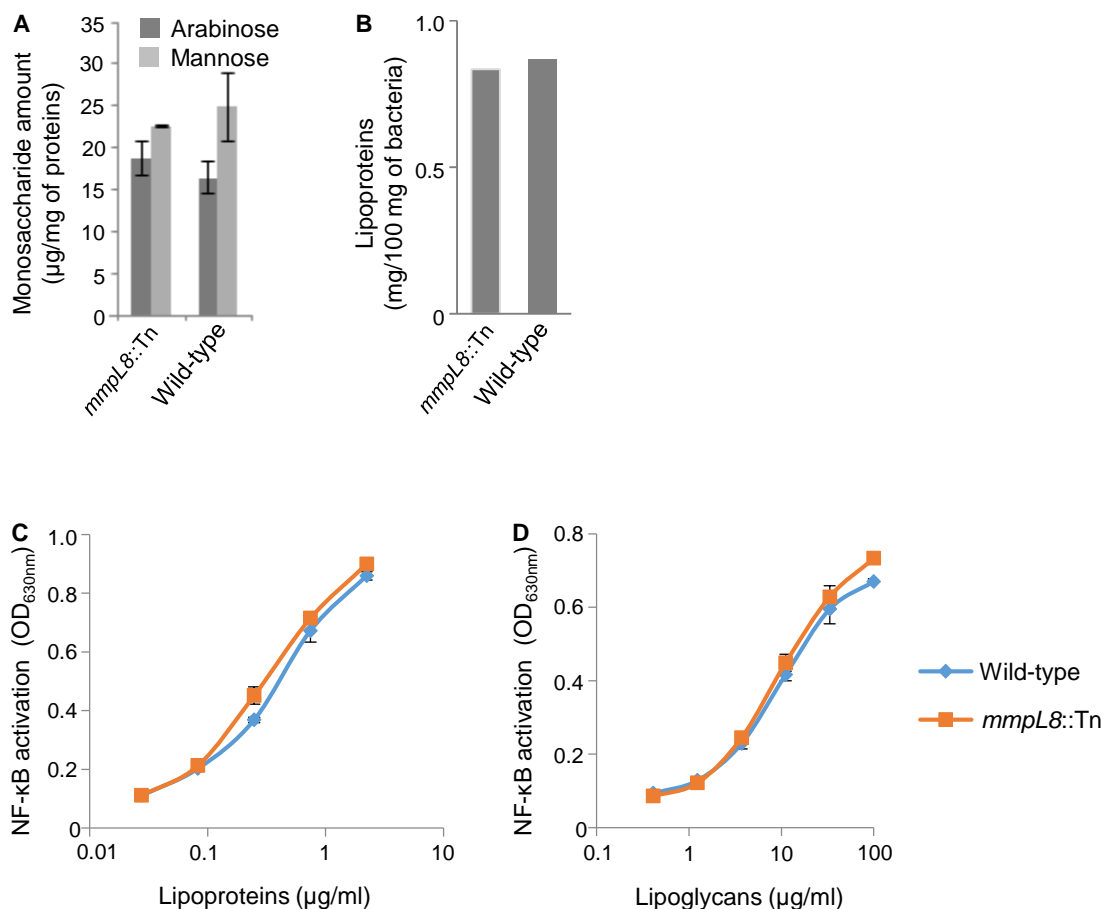

**Fig. S2: Lipoproteins or lipoglycans are not overproduced in the *mmpL8::Tn* mutant strain (A, B) and show the same capacity than those from the wild-type strain to induce NF-κB activation in THP-1 cells (C, D).**

A) Lipoglycan amount was determined by the quantification of arabinose and mannose. These monosaccharides were quantified from an equivalent amount of 1 μg of proteins by capillary electrophoresis after total acid hydrolysis. B) Lipoprotein amount was obtained by weighing after extraction from bacteria by a phenol/water partition. C, D) THP-1 cells were stimulated with lipoproteins (C) or lipoglycans (D) at the indicated concentrations. After 16h, NF-κB activation was determined by measuring alkaline phosphatase activity in the culture supernatant and reading O.D. at 630 nm.

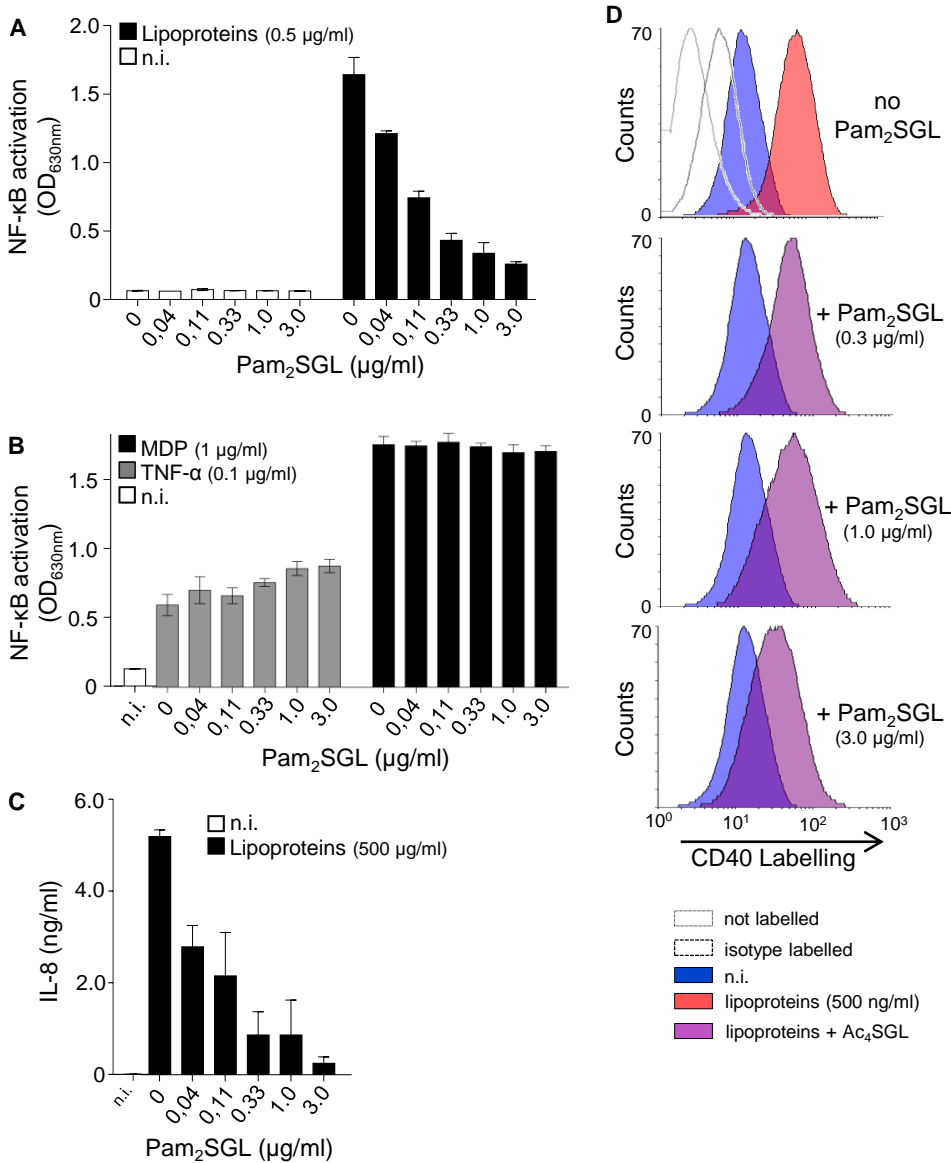

**Fig. S3 : Pam<sub>2</sub>SGL inhibits activation of TLR2 signaling.**

THP-1 cells were stimulated with various stimuli in the presence or not of Pam<sub>2</sub>SGL at the indicated concentrations. After 16h, NF-κB activation (A, B), IL-8 in the culture supernatant (C) and CD40 expression (D) were measured. A, B) NF-κB activation was determined by measuring alkaline phosphatase activity in the culture supernatant and reading O.D. at 630 nm. C) IL-8 release in the culture supernatant was determined by sandwich ELISA. D) CD40 expression was monitored by flow cytometry. Data show mean ± SEM. MDP, muramyl dipeptide, a ligand of NOD2; n.i., not induced.

It is noticeable that Pam<sub>2</sub>SGL, as Ac<sub>4</sub>SGL (Fig. 2B), slightly increased NF-κB activation triggered by MDP. Yet, the underlying mechanisms are unknown.

### FSL-1

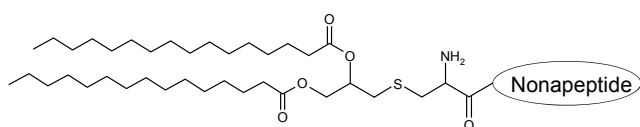

### Pam<sub>3</sub>CSK<sub>4</sub>

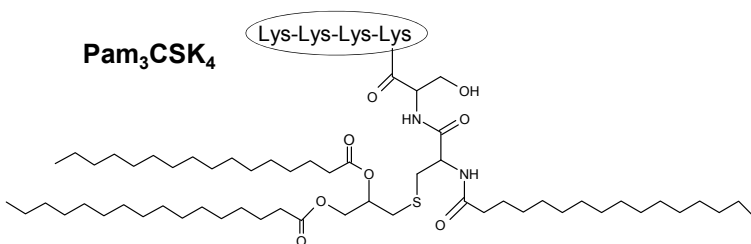

### Lipomannan

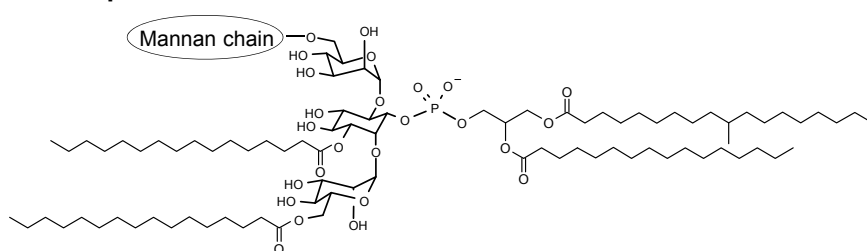

**Fig. S4 : Structure of the different TLR2 ligands used in the study.**

FSL-1 and Pam<sub>3</sub>CSK<sub>4</sub> are synthetic lipopeptides based on an acylated cysteine lipid anchor. Mycobacterial lipoproteins are mainly tri-acylated. Mycobacterial lipomannan is based on a mannosyl-phosphatidyl-*myo*-inositol anchor, which is essentially tri- or tetra-acylated.
